# Supplementary material
Source: publisher site journal article supplement (https://www.spandidos-publications.com/5426/downloadSupplementary)
Supplement: Supplementary file 1 [file downloadSupplementary]

Table SI. Microvessel density in 4T1 tumors.

| Group                        | Control   | WG12399C  | WG12592A  | Zoledronate | CY        |
|------------------------------|-----------|-----------|-----------|-------------|-----------|
| No. of microvessels $\pm$ SD | 6 $\pm$ 2 | 5 $\pm$ 1 | 7 $\pm$ 1 | 6 $\pm$ 1   | 5 $\pm$ 1 |

Mice were inoculated orthotopically with 4T1 cells and treated with BPs. Microvessel density was quantified at a magnification of x200 in five intratumoral areas of the lesion and the final score was determined as a mean of the five quantified areas.
